# Supplementary material for: Phosphoglycerate kinase 1 silencing by a novel microRNA microRNA-4523 protects human osteoblasts from dexamethasone through activation of Nrf2 signaling cascade
Source: PubMed Central journal article supplement (PMC8526604; doi:10.1038/s41419-021-04250-1), 2021-10-19
Supplement: 41419_2021_4250_MOESM1_ESM.pdf [file 41419_2021_4250_MOESM1_ESM.pdf]

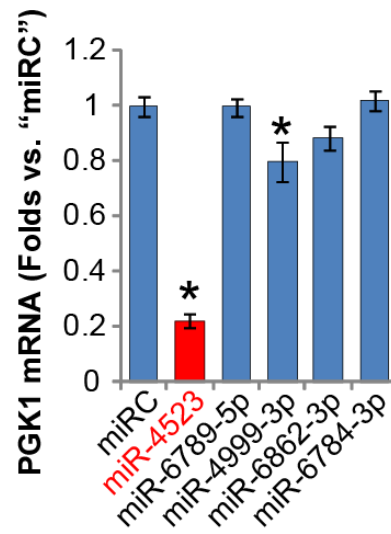

Figure S1. The primary human osteoblasts were transfected with applied miRNA mimics (500 nM each for 24h, two rounds) or the non-sense control miRNA mimic ("miRC", 500 nM for 24h, two rounds), expression of *PGK1* mRNA was shown. Data were presented as mean  $\pm$  standard deviation (SD, n=5). \*  $P < 0.05$  versus "miRC" cells.
